# Supplementary material
Source: PubMed Central journal article supplement (PMC4968940)
Supplement: NIHMS31359-supplement-SI_file.pdf [file NIHMS31359-supplement-SI_file.pdf]

**2-Triazole-Substituted Adenosines: A New Class of Selective A<sub>3</sub> Adenosine Receptor  
Agonists, Partial Agonists, and Antagonists**

*Liesbet Cosyn, Krishnan K. Palaniappan, Soo-Kyung Kim, Heng T. Duong, Zhan-Guo Gao,  
Kenneth A. Jacobson\*, Serge Van Calenbergh\**

## Elemental Analysis

|    | Calculated |      |       | Found |      |              |
|----|------------|------|-------|-------|------|--------------|
|    | C          | H    | N     | C     | H    | N            |
| 1  | 43.70      | 4.80 | 31.36 | 44.01 | 4.70 | 31.54        |
| 2  | 47.87      | 5.36 | 29.77 | 47.71 | 5.55 | 29.52        |
| 3  | 50.49      | 5.98 | 27.71 | 50.69 | 6.08 | 27.41        |
| 4  | 44.89      | 5.27 | 27.92 | 45.27 | 5.27 | 28.05        |
| 5  | 47.40      | 5.72 | 31.09 | 47.55 | 5.64 | <b>30.41</b> |
| 6  | 53.77      | 4.75 | 26.40 | 53.67 | 4.89 | 26.08        |
| 7  | 50.82      | 4.50 | 29.63 | 50.73 | 4.77 | 29.29        |
| 8  | 54.76      | 5.43 | 23.22 | 54.50 | 5.41 | 22.93        |
| 9  | 54.79      | 5.06 | 25.56 | 54.66 | 5.24 | 25.33        |
| 10 | 53.01      | 6.09 | 26.03 | 53.11 | 6.31 | 25.80        |
| 11 | 54.04      | 6.35 | 25.21 | 54.02 | 6.49 | 24.93        |
| 12 | 54.79      | 5.06 | 25.56 | 54.58 | 5.22 | 25.30        |
| 13 | 53.84      | 5.16 | 23.92 | 53.99 | 5.12 | 23.71        |
| 14 | 50.80      | 4.48 | 23.70 | 50.63 | 4.30 | 23.38        |
| 15 | 46.27      | 4.92 | 32.38 | 46.00 | 5.15 | 32.02        |
| 16 | 51.23      | 6.11 | 28.30 | 51.06 | 6.28 | 27.97        |
| 17 | 51.50      | 4.75 | 30.03 | 51.43 | 4.99 | <b>29.55</b> |
| 18 | 55.11      | 5.26 | 26.29 | 55.37 | 5.39 | 26.10        |
| 19 | 53.49      | 6.20 | 26.73 | 53.12 | 6.44 | 26.38        |
| 20 | 54.69      | 5.47 | 19.62 | 54.88 | 5.55 | 19.22        |
| 23 | 40.98      | 4.38 | 34.78 | 40.54 | 4.75 | 34.39        |
| 31 | 42.97      | 4.72 | 34.70 | 43.16 | 5.01 | 34.39        |
| 33 | 46.71      | 4.14 | 24.21 | 47.01 | 4.33 | 23.84        |
